# Supplementary material for: WO3 Nanorods Decorated with Very Small Amount of Pt for Effective Hydrogen Evolution Reaction
Source: MDPI journal article supplement (doi:10.3390/nano13061071), 2023-03-16
Supplement: s1 [file s1]

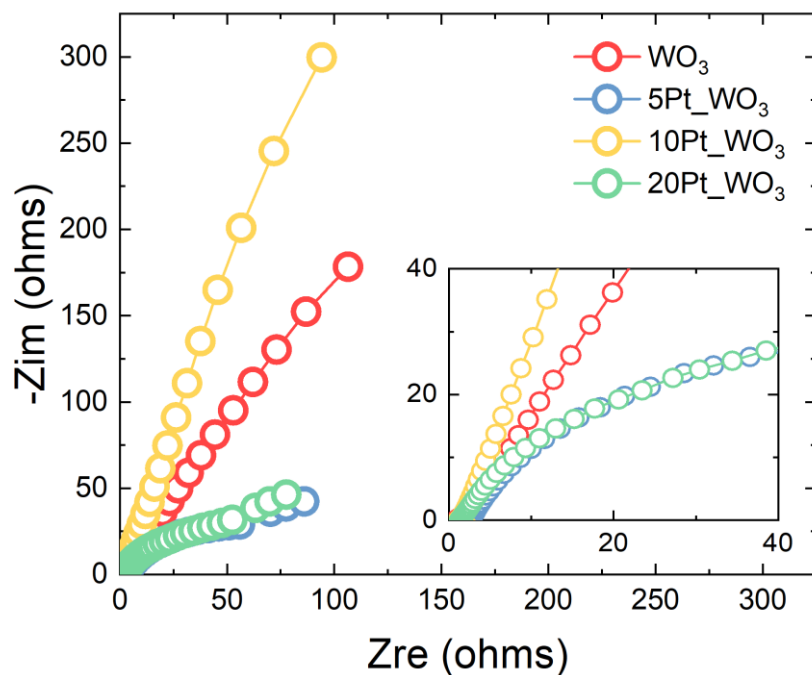

**Figure S1:** Nyquist plot obtained from EIS analysis at open circuit potential of the  $\text{WO}_3$ ,  $5\text{Pt\_WO}_3$ , the  $10\text{Pt\_WO}_3$  and the  $20\text{Pt\_WO}_3$  electrodes (red, blue, yellow, and green circles, respectively). Inset: magnification of the high frequency region.

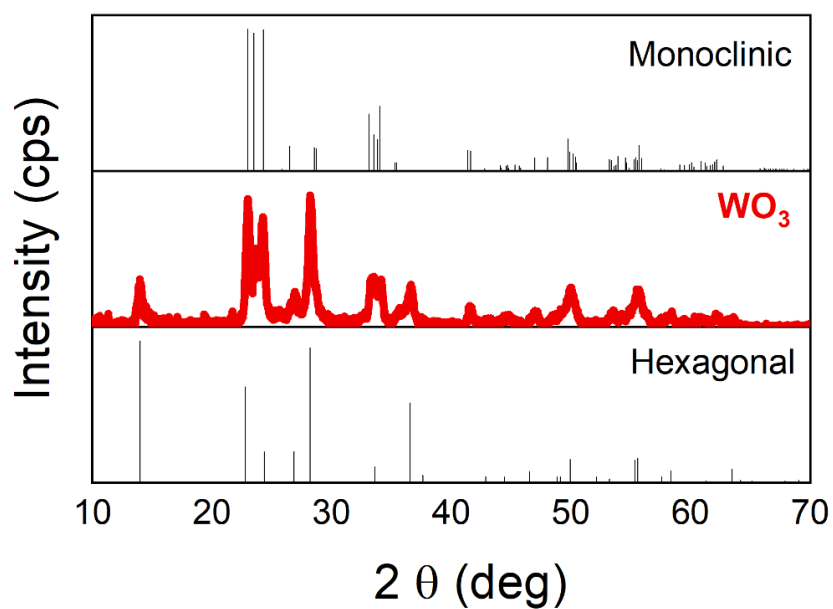

**Figure S2:** XRD pattern of the  $\text{WO}_3$  nanorods (red line) compared with the characteristic patterns of hexagonal and monoclinic  $\text{WO}_3$ : Both hexagonal ( $2\theta = 14^\circ, 24.37^\circ, 26.85^\circ, 28.22^\circ, 33.61^\circ, 36.57^\circ$ , and  $49.95^\circ$ ) and monoclinic ( $2\theta = 23^\circ, 23.50^\circ, 24.28^\circ, 33.12^\circ, 33.54^\circ, 33.83^\circ, 34.04^\circ, 49.74^\circ, 55.71^\circ$ ) characteristic peaks appear, thus confirming the formation of stable phase junctions.

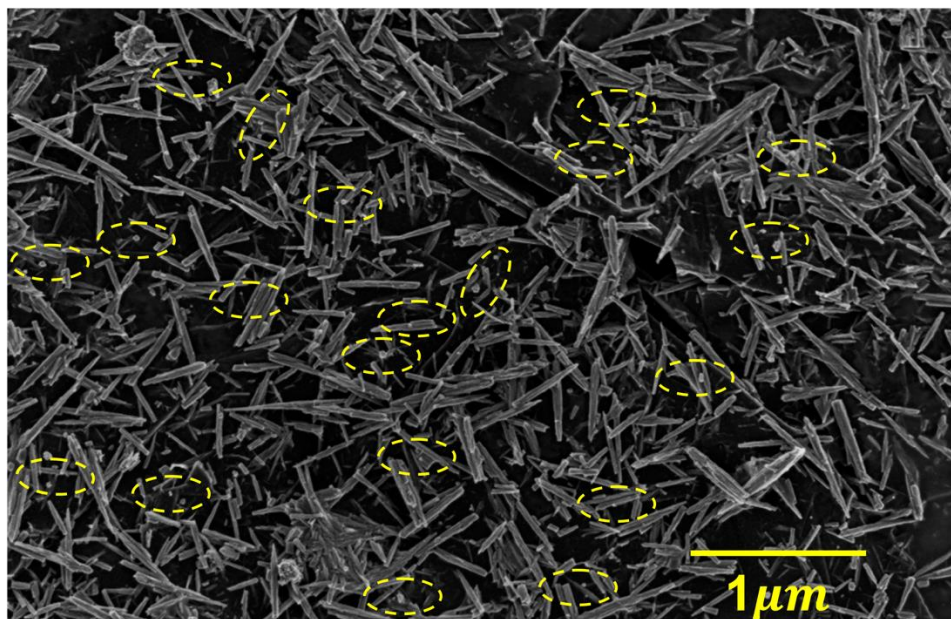

**Figure S3:** Low magnification SEM image of the 10Pt\_WO<sub>3</sub> electrode in which the most visible Pt nanoparticles are highlighted in yellow.

#### RIR methods

The RIR method is used for the calculation of phase composition in a hybrid phase structure, in terms of weight ratio (w%) starting from the intensities of the strongest line of the X-ray diffraction patterns ( $I$ ) as follows [1-2]:

$$W_h = \frac{I_h}{I_h + (I_m / (RIR_m / RIR_h))} \quad (S4)$$

$$W_m = \frac{I_m}{I_m + (I_h / (RIR_h / RIR_m))} = 1 - W_a \quad (S5)$$

where  $h$  and  $m$  denote the different coexistent hexagonal and monoclinic crystal phases respectively and the  $RIR$  values depend on the analyzed crystal phases. The  $RIR$  values for the  $h$ - and  $m$ -WO<sub>3</sub> are 8.33 (PDF #89-4476) and 5.58 (PDF #75-2187). The monoclinic (hexagonal) weight ratio in the WO<sub>3</sub> based nanorods is 56 % (44 %), thus confirming the phase heterogeneity of WO<sub>3</sub> nanorods and the presence of hexagonal and monoclinic crystallites in contact each other to form phase junctions [3].

#### References

- [1] Du, Y.; Hao, Q.; Chen, D.; Chen, T.; Hao, S.; Yang, J.; Ding, H.; Yao, W.; Song, J. Facile Fabrication of Heterostructured Bismuth Titanate Nanocomposites: The Effects of Composition and Band Gap Structure on the Photocatalytic Activity Performance. *Catal. Today* **2017**, 297, 255–263, doi:10.1016/j.cattod.2016.12.048.
- [2] Kang, M.; Liang, J.; Wang, F.; Chen, X.; Lu, Y.; Zhang, J. Structural Design of Hexagonal/Monoclinic WO<sub>3</sub> Phase Junction for Photocatalytic Degradation. *Mater. Res. Bull.* **2020**, 121, 110614, doi:10.1016/j.materresbull.2019.110614.
- [3] Mineo, G.; Scuderi, M.; Bruno, E.; Mirabella, S. Engineering Hexagonal/Monoclinic WO<sub>3</sub>Phase Junctions for Improved Electrochemical Hydrogen Evolution Reaction. *ACS Appl. Energy Mater.* **2022**, 5, 9702–9710, doi:10.1021/acsaem.2c01383.
